# Supplementary material
Source: publisher figshare collection journal article supplement (https://asha.figshare.com/ndownloader/files/38149080)
Supplement: Supplementary file 1 [file 38149080]

**Supplemental Material S1.** Dialect density for each child in the play-based sample and the picture description task.

| <b>Participant Number</b> | <b>Play Sample Dialect Density</b> | <b>Picture Description Dialect Density</b> |
|---------------------------|------------------------------------|--------------------------------------------|
| 1                         | 6%                                 | 8%                                         |
| 2                         | 6%                                 | 8%                                         |
| 3                         | 3%                                 | 97%                                        |
| 4                         | 5%                                 | 10%                                        |
| 5                         | 10%                                | 63%                                        |
| 6                         | 8%                                 | 90%                                        |
| 7                         | 23%                                | 88%                                        |
| 8                         | 37%                                | 98%                                        |
| 9                         | 15%                                | 63%                                        |
| 10                        | 21%                                | 84%                                        |
| 11                        | 22%                                | 64%                                        |
| 12                        | 21%                                | 26%                                        |
| 13                        | 14%                                | 93%                                        |
| 14                        | 27%                                | 55%                                        |
| 15                        | 32%                                | 65%                                        |
| 16                        | 17%                                | 82%                                        |
| 17                        | 26%                                | 92%                                        |
| 18                        | 14%                                | 18%                                        |
